1 **A persistent lack of international representation on editorial boards in**  
2 **environmental biology**

3  
4 Johanna Espin<sup>1,2</sup>, Sebastian Palmas<sup>3</sup>, Farah Carrasco-Rueda<sup>4</sup>, Kristina Riemer<sup>5</sup>, Pablo  
5 E. Allen<sup>6</sup>, Nathan Berkebile<sup>4</sup>, Kirsten A. Hecht<sup>4,7</sup>, Kay Kastner-Wilcox<sup>8</sup>, Mauricio M.  
6 Núñez-Regueiro<sup>5,\*</sup>, Candice Prince<sup>9</sup>, Constanza Rios<sup>4</sup>, Erica Ross<sup>3</sup>, Bhagatveer  
7 Sangha<sup>10</sup>, Tia Tyler<sup>9</sup>, Judit Ungvari-Martin<sup>11,7,\*\*</sup>, Mariana Villegas<sup>5</sup>, Tara T. Cataldo<sup>12</sup>,  
8 and Emilio M. Bruna<sup>2,5\*\*\*</sup>  
9

10 <sup>1</sup> Dept. of Sociology and Criminology & Law, University of Florida, Gainesville, USA

11 <sup>2</sup> Tropical Conservation and Development Program, Center for Latin American Studies,  
12 University of Florida, Gainesville, USA

13 <sup>3</sup> School of Forest Resources and Conservation, University of Florida, Gainesville, USA

14 <sup>4</sup> School of Natural Resources and Environment, University of Florida, Gainesville, USA

15 <sup>5</sup> Dept. of Wildlife Ecology & Conservation, University of Florida, Gainesville, USA

16 <sup>6</sup> Entomology and Nematology Dept., University of Florida, Gainesville, USA

17 <sup>7</sup> Florida Museum of Natural History, University of Florida, Gainesville, USA

18 <sup>8</sup> Soil and Water Sciences Dept., University of Florida, Gainesville, USA

19 <sup>9</sup> Dept. of Environmental Horticulture, University of Florida, Gainesville, USA

20 <sup>10</sup> Horticultural Sciences Dept., University of Florida, Gainesville, USA

21 <sup>11</sup> Dept. of Biology, University of Florida, Gainesville, USA

22 <sup>12</sup> Martson Science Library, University of Florida, Gainesville, USA  
23

24

25

26 \*Current Address: Smithsonian Migratory Bird Center, Washington, DC, USA

27 \*\*Current Address: School of Natural Resources & Environment, University of Florida,

28 Gainesville, USA

29 \*\*\*Corresponding author: [embruna@ufl.edu](mailto:embruna@ufl.edu)

30

31

32 **Key words:** bias, editorial board, geographic diversity, peer review, scientific

33 publishing, scientometrics

34

35

## INTRODUCTION

36

37

38

39

40

41

42

43

44

45

46

47

48

49

50

51

52

53

54

55

56

57

There are currently over 28,000 peer-reviewed academic journals [1], and the scholars who serve on the editorial boards of these journals play a major role in defining the trajectory and boundaries of knowledge in their disciplines [2]. This is because board members are responsible for coordinating the evaluation by outside experts of a manuscript's technical aspects and the "importance" or "novelty" of the research it summarizes, i.e., peer review, on which the decision to publish a manuscript is ultimately based. Editors also play a central but underappreciated role in shaping the community of scholars contributing to the discourse in their field. First, by recommending the publication of an article the editor confers legitimacy not only on the research, but also upon the individuals who carried it out [3-5]. Second, editors help choose new editors. In doing so, they confer enhanced status and visibility on a select group of scholars who then benefit from the unique opportunities for professional advancement provided by board membership [6]. Editors are therefore a small but powerful group of "Gatekeepers" [2] that select the scientists and ideas shaping the direction of their discipline.

The increased recognition of editor power, along with the results of studies on workforce diversity [7], have heightened concerns about how the composition of editorial boards might influence the peer-review process [8]. For example, it has been suggested that boards whose members are demographically homogenous might converge on a narrow suite of research topics and approaches they consider worthy of publication [3,4]. This narrow vision – and the board structure driving it – could be perpetuated by editors nominating collaborators, whose perspectives and backgrounds

58 likely match their own, for board service [9]. Indeed, this is among the principal reasons  
59 put forward to explain why women remain severely underrepresented on editorial  
60 boards across academic fields [6], which has consequences for the selection of referees  
61 and other critical aspects of the editorial process [10].

62         Recent decades have seen the rapid globalization of research in science,  
63 technology, engineering, and math (STEM), resulting in greater representation in  
64 international journals of authors based in the ‘Global South’ [11,12]. i.e., the world’s  
65 ‘developing’ or ‘emerging’ economies located primarily in Latin America, Asia, Africa,  
66 and the Middle East [13]. Having editorial boards that reflect this increasing ‘geographic  
67 diversity’ of the global scientific community is thought to benefit both journals and  
68 disciplines in ways that parallel the benefits resulting from other forms of diversity. In  
69 field-based sciences such as ecology or geology, for example, editors based in the  
70 region where studies are conducted will be more familiar with the environmental, social,  
71 and economic context and constraints under which they were carried out [14]. This  
72 could ensure both more rigorous review and a fairer assessment of reviewer criticisms  
73 and proposed improvements. Furthermore, scientists trained in different countries or  
74 regions can also have very different epistemological orientations. Increasing geographic  
75 diversity on an editorial board could therefore broaden the scope of theoretical and  
76 methodological approaches a journal publishes. Ultimately, these benefits of  
77 internationalizing editorial boards could help to minimize the apparent biases in the  
78 review, publication, and citation of articles based on an author’s nationality or home-  
79 country [12,15].

80           The first systematic efforts to quantify the nationality of STEM editors – often by  
81 using the country in which they were based as a proxy for nationality – were carried out  
82 in the early 1980's [16,17]. Since then a small but growing number of studies have  
83 observed similar patterns to what these early ones did – individual editorial boards tend  
84 to be dominated by scholars from the United States of America (USA) and United  
85 Kingdom (UK) [8]. However, prior studies typically compared board composition of  
86 journals using data from only a single calendar year, which makes it impossible to  
87 evaluate how the community of gatekeepers has changed over time. Furthermore, most  
88 of the journals reviewed are from the physical sciences, medical fields, or lab-based  
89 biological sciences [4,18]. As a result, almost nothing is known about geographic  
90 diversity of editors in field-based STEM disciplines [19] such as ecology, evolution, and  
91 natural resource management (hereafter “environmental biology”, EB).

92           The term “diversity” is often used colloquially to mean “the representation of  
93 different groups in a focal population or workplace”. However, one can formally quantify  
94 the diversity of a community (e.g., an assemblage of editors) using a suite of indices  
95 derived from information theory. While the indices differ in their assumptions and  
96 applications, the most commonly used ones are calculated using two types of  
97 information: the number of categories found in a sample (i.e., “richness”) and the  
98 relative abundance of these categories (i.e., “evenness”). Most studies of editorial board  
99 composition to date only report the number of countries represented by editors, i.e.,  
100 Geographic Richness. However, diversity indices permit a more nuanced evaluation of  
101 community composition. For example, using only Richness might lead one to conclude  
102 that the geographic representation of editors from different countries has remained

103 steady over time, when in fact one country has become numerically dominant. Another  
104 advantage of diversity indices is that they can be compared across groups (e.g.,  
105 journals), even if the groups differ in richness or population size.

106 We identified all scientists serving from 1984-2015 on the editorial boards of 24  
107 leading journals in Environmental Biology (Table S1) and the countries in which they  
108 were based during their board tenure. We then calculated the Geographic Richness and  
109 Geographic Diversity of this editor community and quantified how it has changed over  
110 the last three decades. Finally, we assessed the geographic distribution of editors at  
111 broader geographic and macroeconomic scales by comparing the representation of  
112 editors from different World Bank geographic regions and national income categories  
113 (details on data collection and analysis are in Text S1).

114

### 115 **How geographically diverse is the editorial community?**

116 Between 1985-2014, N = 3831 scientists served as editors for our N = 24 focal  
117 journals. The size of the editor community increased steadily over time, with 420% more  
118 editors serving in 2014 than in 1985 (Fig 1A). Not surprisingly, this led to an increase in  
119 the Geographic Richness of the editor community – the number of countries  
120 represented by editors in 2014 was 52% higher than in 1985 (N=52 vs. N = 34), and the  
121 number of countries to have been represented by at least one editor increased from 34  
122 to 70 (an increase of 86%; Fig 1B). However, scientists based in the USA and UK made  
123 up an overwhelming majority of the editor community (55.29% and 11.77%,  
124 respectively; Fig 2A). Although there have been modest increases (>1%) from 1985 to  
125 2014 in the proportion of editors based in five other countries (Fig D in S1 Text), the

126 continued concentration of editors in a very small number of countries is why the low  
127 Geographic Diversity observed in 1985 has remained unchanged through 2014 (Fig 1C,  
128 Table A in S1 Text).

129 These patterns are echoed when assessing representation at broader geographic  
130 or macroeconomic scales. The proportion of editors each year that were based in North  
131 America varied from 46%-59%, while 28-41% were based in Europe/Central Asia (Fig  
132 2B-C). The number of editors from the East Asia/Pacific region doubled from 1985 to  
133 2014 (5.6% and 11.9%, respectively; Text S1 Fig C), but most of these were in the high-  
134 income countries of Australia, New Zealand, Singapore, and Japan. This concentration  
135 of editors in the Global North – the group of economically developed countries with high  
136 per capita Gross Domestic Product (GDP) that collectively concentrate most global  
137 wealth [13] – was observed at all levels of the gatekeeper hierarchy: 94% of Subject  
138 and Associate Editors, and a remarkable 98.2% of Editors-in-Chief, are based in high-  
139 income countries or Western Europe (Table 1, Text S1). In contrast, only a fraction of  
140 editors have been based in the Global South (Fig 2B-C). Why this disparity persists  
141 despite the well-documented increases in the number and productivity of the region's  
142 scientists [12,19,20] remains unclear. A smaller scientific community may well have  
143 been a contributing factor thirty years ago, but it is no longer sufficient to explain why in  
144 2014 Sweden, New Zealand, and the Netherlands were each home to more editors than  
145 Brazil, Mexico, India, or China (Netherlands = 40, Sweden = 25, New Zealand = 26,  
146 China = 22, Brazil = 15, India = 10, Mexico = 9).

147

148 **What does this lack of diversity mean and why does it matter?**

149           Although the increasing Geographic Richness of editors is a positive  
150 development, it is dispiriting that Geographic Diversity remains unchanged.  
151 Unfortunately, it will remain low until a greater proportion of editors are based outside of  
152 the USA and UK. But does a lack of geographic representation – be it at the national,  
153 regional, or macroeconomic level –have consequences for the process of evaluating  
154 manuscripts that could ultimately limit the scope and direction of research in  
155 environmental biology? Put bluntly, do editors and reviewers from high-income regions  
156 like the USA or UK have biases – implicit or otherwise – that affect how they evaluate  
157 submissions from scientists based in the Global South? Although one journal in our  
158 survey found no evidence that reviewer or author nationality influences the likelihood  
159 manuscripts are accepted [21,22], this contrasts sharply with the results of prior studies  
160 in other STEM fields [23]. There is also compelling evidence that the country in which  
161 authors are based affects where their papers are ultimately published and how much  
162 they are cited [12,24,25]. In light of these results, and the ample data on how gender  
163 and ethnic background influence other aspects of academic evaluation [26], we  
164 recommend Editors-in-Chief work to increase the geographic representation on their  
165 boards, make editorial board members and referees aware of how biases based on  
166 author nationality can affect their editorial judgement, and conduct internal analyses of  
167 the potential factors influencing manuscript fate.

168           Internationalizing editorial boards can also have positive impacts for journals in  
169 addition to mitigating possible implicit biases. First, scientists who presume their work  
170 will not be judged fairly because of their nationality or the country in which they are  
171 based [i.e., the “biased author effect”, 27] may be more likely to submit their



172 manuscripts to journals that have editors representing their region. This both increases  
173 the number and scope of submissions a journal receives, and the size and expertise of  
174 its reviewer pool. Second, a globally diverse editorial board can serve as an important  
175 signal of journal quality and connote prestige [28], especially to those tasked with  
176 evaluating individual, institutional, or national scientific productivity [18]. Third, it can  
177 enhance the profile and impact of the journal and articles published (to say nothing of  
178 justification for editors to demand more support or resources from their publishers).  
179 Finally, capacity building is often central to the mission of the academic societies. By  
180 providing editorial opportunities to scholars from emerging scientific regions, society  
181 journals can play a pivotal role in achieving this goal.

182         Decades of research have highlighted the positive influence of diversity on  
183 scientific research teams [29]. Although we recognize editorial boards do not operate in  
184 precisely the same way workplace teams do, we believe that geographic diversity can  
185 similarly enhance the creativity and impact of scholarship published in scientific  
186 journals. While we by no means advocate a quota system for countries or regions, we  
187 reiterate prior calls for journal leadership to strive for more geographically diverse  
188 editorial boards [19] whose composition mirrors that of their authors (Fig 3) and where  
189 they work [14,20]. These efforts, however, must be guided by specific plans and  
190 timetables to provide both guidance to editors and hold them accountable for their  
191 commitments [30]. Whether such plans underlie the geographic diversity we observed  
192 on a few of the editorial boards we reviewed is unknown (Appendix A). Nevertheless,  
193 these examples of journals with geographically widespread editors undermine the  
194 frequent argument that it is challenging to find and recruiting board members from the

195 Global South with the requisite academic background, editorial experience, and time to  
196 serve. We believe that recruiting these editors is the ethical duty of a journal's  
197 leadership, especially given the impact their presence on the board can have on the  
198 global scientific community and the diffusion of the knowledge they create in the service  
199 of society. Where to find them? We humbly suggest their large and geographically  
200 diverse pool of authors (Fig 3) is an ideal place to start.

201

202

### **ACKNOWLEDGEMENTS**

203 We thank Juan Pablo Gomez for helpful discussions and assistance with data collection  
204 and T. Bloom, L. Bero, and an anonymous reviewer for comments on the manuscript.

205 This manuscript was completed while EB was Faculty-in-Residence at the University of  
206 Florida Marston Science Library.

## REFERENCES

1. Ware M, Mabe M. The STM report: An overview of scientific and scholarly journal publishing. 2015. International Association of Scientific Technical and Medical Publishers. The Hague, The Netherlands. 'Available at:' [http://www.stm-  
assoc.org/2015\\_02\\_20\\_STM\\_Report\\_2015.pdf](http://www.stm-<br/>assoc.org/2015_02_20_STM_Report_2015.pdf)
2. Crane D. The gatekeepers of science: Some factors affecting the selection of articles for scientific journals. *The American Sociologist*. 1967;2(4):195-201.
3. Metz I, Harzing A-W. Gender diversity in editorial boards of management journals. *Academy of Management Learning & Education*. 2009;8(4):540-57. doi: 10.5465/AMLE.2009.47785472.
4. Garcia-Carpintero E, Granadino B, Plaza LM. The representation of nationalities on the editorial boards of international journals and the promotion of the scientific output of the same countries. *Scientometrics*. 2010;84(3):799-811. doi: 10.1007/s11192-010-0199-3.
5. Willett P. The characteristics of journal editorial boards in library and information science. *International Journal Of Knowledge Content Development And Technology*. 2013;3(1):5-17. doi: 10.5865/IJKCT.2013.3.1.005.
6. Cho AH, Johnson SA, Schuman CE, Adler JM, Gonzalez O, Graves SJ, et al. Women are underrepresented on the editorial boards of journals in environmental biology and natural resource management. *PeerJ*. 2014;2:e542. doi: 10.7717/peerj.542.
7. Cox TH, Blake S. Managing cultural diversity: Implications for organizational competitiveness. *The Executive*. 1991:45-56.

8. Mazov NA, Gureev VN. The editorial boards of scientific journals as a subject of scientometric research: a literature review. *Scientific and Technical Information Processing*. 2016;43(3):144-53. doi: 10.3103/s0147688216030035.
9. Burgess TF, Shaw NE. Editorial board membership of management and business journals: A social network analysis study of the Financial Times 40. *British Journal of Management*. 2010;21(3):627-48. doi: 10.1111/j.1467-8551.2010.00701.x.
10. Fox CW, Burns CS, Meyer JA, Thompson K. Editor and reviewer gender influence the peer review process but not peer review outcomes at an ecology journal. *Functional Ecology*. 2016;30(1):140-53. doi: 10.1111/1365-2435.12529.
11. Holmgren M, Schnitzer SA. Science on the rise in developing countries. *Plos Biol*. 2004;2(1):e1. doi: 10.1371/journal.pbio.0020001.
12. Smith MJ, Weinberger C, Bruna EM, Allesina S. The scientific impact of nations: Journal placement and citation performance. *PLoS ONE*. 2014;9(10):e109195. doi: 10.1371/journal.pone.0109195.
13. Independent Commission on International Development Issues. *North-South: a programme for survival: report of the Independent Commission on International Development Issues*. Cambridge, MA: MIT Press; 1980.
14. Mammides C, Goodale UM, Corlett RT, Chen J, Bawa KS, Hariya H, et al. Increasing geographic diversity in the international conservation literature: A stalled process? *Biological Conservation*. 2016;198:78-83. doi: 10.1016/j.biocon.2016.03.030.

15. Meneghini R, Packer AL, Nassi-Calo L. Articles by Latin American authors in prestigious journals have fewer citations. *PLoS ONE*. 2008;3(11). doi: 10.1371/journal.pone.0003804.
16. Bakker P, Rigter H. Editors of medical journals - who and from where. *Scientometrics*. 1985;7(1-2):11-22. doi: 10.1007/bf02020137.
17. Braun T, Bujdoso E. Gatekeeping patterns in the publication of analytical-chemistry research. *Talanta*. 1983;30(3):161-7. doi: 10.1016/0039-9140(83)80043-5.
18. Nisonger TE. The relationship between international editorial board composition and citation measures in political science, business, and genetics journals. *Scientometrics*. 2002;54(2):257-68. doi: 10.1023/A:1016065929026.
19. Livingston G, Waring B, Pacheco LF, Buchori D, Jiang YX, Gilbert L, et al. Perspectives on the global disparity in ecological science. *Bioscience*. 2016;66(2):147-55. doi: 10.1093/biosci/biv175.
20. Stocks G, Seales L, Paniagua F, Maehr E, Bruna EM. The geographical and institutional distribution of ecological research in the tropics. *Biotropica*. 2008;40(4):397-404. doi: 10.1111/j.1744-7429.2007.00393.x.
21. Campos-Arceiz A, Primack RB, Koh LP. Reviewer recommendations and editors' decisions for a conservation journal: Is it just a crapshoot? And do Chinese authors get a fair shot? *Biological Conservation*. 2015;186:22-7. doi: 10.1016/j.biocon.2015.02.025.
22. Primack RB, Ellwood E, Miller-Rushing AJ, Marrs R, Mulligan A. Do gender, nationality, or academic age affect review decisions? An analysis of submissions

- to the journal *Biological Conservation*. *Biological Conservation*. 2009;142(11):2415-8. doi: 10.1016/j.biocon.2009.06.021.
23. Lee CJ, Sugimoto CR, Zhang G, Cronin B. Bias in peer review. *Journal of the American Society for Information Science and Technology*. 2013;64(1):2-17. doi: 10.1002/asi.22784.
  24. Mori AS, Qian SH, Tatsumi S. Academic inequality through the lens of community ecology: a meta-analysis. *PeerJ*. 2015;3(3):e1457. doi: 10.7717/peerj.1457.
  25. Meijaard E, Cardillo M, Meijaard EM, Possingham HP. Geographic bias in citation rates of conservation research. *Conserv Biol*. 2015;29(3):920-5. doi: 10.1111/cobi.12489.
  26. Menges RJ, Exum WH. Barriers to the progress of women and minority faculty. *The Journal of Higher Education*. 1983;54(2):123-44. doi: 10.1080/00221546.1983.11778167.
  27. Akre O, Barone-Adesi F, Pettersson A, Pearce N, Merletti F, Richiardi L. Differences in citation rates by country of origin for papers published in top-ranked medical journals: do they reflect inequalities in access to publication? *J Epidemiol Commun H*. 2011;65(2):119-23. doi: 10.1136/jech.2009.088690.
  28. Pearson C, Mullen R, Thomason W, Phillips S. Associate editor's role in helping authors and upholding journal standards. *Agronomy Journal*. 2006;98(3):417-22. doi: 10.2134/agronj2005.0296.

29. Liao C. How to improve research quality? Examining the impacts of collaboration intensity and member diversity in collaboration networks. *Scientometrics*. 2011;86(3):747-61. doi: 10.1007/s11192-010-0309-2.
30. Calver M, Wardell-Johnson G, Bradley S, Taplin R. What makes a journal international? A case study using conservation biology journals. *Scientometrics*. 2010;85(2):387-400. doi: 10.1007/s11192-010-0273-x.

**Table 1:** Percentage of the editorial board members from N = 24 environmental biology journals based in different (A) World Bank Country Income Categories and (B) Global Regions. Between 1985-2014 there were N = 3831 unique editors from 70 countries. The total number of editors in each region and national income category differs due to some editors having moved between 1984-2015; similarly, one person may serve multiple editorial roles. Numbers in parentheses are the number of unique editors in each category. Abbreviations: EIC: Editor-in-Chief, AE: Associate Editor, SE: Subject Editor, SpE: Special Category Editor.

| <b>(A) World Bank National Income Category</b> | <b>Total No. of Editors</b> | <b>% of EIC<br/>(N = 171)</b> | <b>% of AE<br/>(N = 247)</b> | <b>% of SE<br/>(N = 3690)</b> | <b>% of SpE<br/>(N = 80)</b> |
|------------------------------------------------|-----------------------------|-------------------------------|------------------------------|-------------------------------|------------------------------|
| High income OECD                               | 3608                        | 97.66                         | 92.71                        | 93.36                         | 97.50                        |
| High income Non-OECD                           | 51                          | 0.58                          | 1.62                         | 1.33                          | 1.25                         |
| Upper-middle income                            | 152                         | 1.75                          | 4.45                         | 4.01                          | 1.25                         |
| Lower-middle income                            | 44                          | 0.0                           | 1.21                         | 1.17                          | 0                            |
| Low income                                     | 5                           | 0.0                           | 0.0                          | 0.14                          | 0                            |
|                                                | Total = 3860                |                               |                              |                               |                              |
| <b>(B) Global Region</b>                       | <b>Total No. of Editors</b> | <b>% of EIC<br/>(N = 171)</b> | <b>% of AE<br/>(N = 251)</b> | <b>% of SE<br/>(N = 3729)</b> | <b>% of SpE<br/>(N = 82)</b> |
| North America                                  | 2376                        | 50.29                         | 49.00                        | 61.22                         | 67.07                        |
| Europe & Central Asia                          | 1025                        | 45.03                         | 35.86                        | 25.69                         | 23.17                        |
| East Asia & Pacific                            | 312                         | 2.34                          | 8.76                         | 7.91                          | 7.32                         |
| Latin America & Caribbean                      | 108                         | 0.58                          | 4.38                         | 2.82                          | 1.22                         |
| Sub-Saharan Africa                             | 50                          | 1.75                          | 1.59                         | 1.26                          | 1.22                         |
| South Asia                                     | 24                          | 0.0                           | 0.40                         | 0.62                          | 0                            |
| Middle East & North Africa                     | 18                          | 0.0                           | 0.00                         | 0.48                          | 0                            |
|                                                | Total = 3911                |                               |                              |                               |                              |



## FIGURE LEGENDS

### **Fig 1. Community composition of editors in environmental biology (1985-2014).**

(A) Geographic Richness: Cumulative Richness is the total number of countries represented by at least one editor through a given year; Annual Richness is the total number of countries represented by editors in each year (B) The total number of unique editors serving each year from 1985-2014 (C) the Geographic Diversity of editors in environmental biology each year from 1985-2014. We measured diversity using the reciprocal of Simpson's index,  $D_2$ . Larger values of  $D_2$  indicate greater diversity, with the maximum potential diversity (MPD) equal to the greatest number of countries represented in any one year of the survey (MPD Editors = 52). For additional details see S1 Text.

### **Fig 2. The percentage of environmental biology editors based in different countries, global regions, and World Bank national income categories.**

(A) Countries; Abbreviations: USA: United States of America, GBR: United Kingdom, CAN: Canada, AUS: Australia, NLD: Netherlands, FRA: France, SWE: Sweden, CHE: Switzerland. (B) World Bank global regions (C) World Bank Gross National Income categories.

### **Fig 3. Cumulative Geographic Richness of editors and authors in environmental biology (1985-2014).**

Rarefaction curves were generated using data on the editorial board membership of 24 environmental biology journals (Table S1) and the institutional addresses of authors publishing in those journals (N = 100,031 articles; S1 Text).

(A) Number of Editors

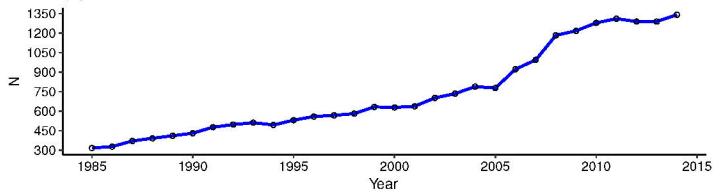

(B) Editor Geographic Richness

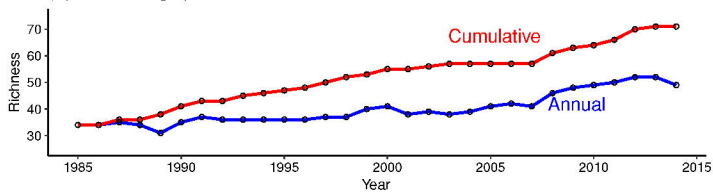

(C) Editor Geographic Diversity

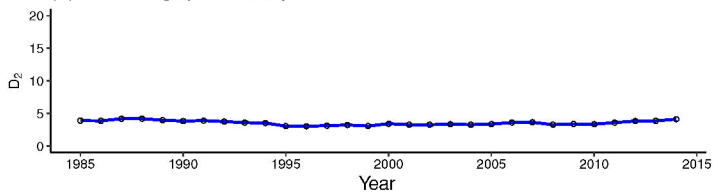

(A) Editors by Country

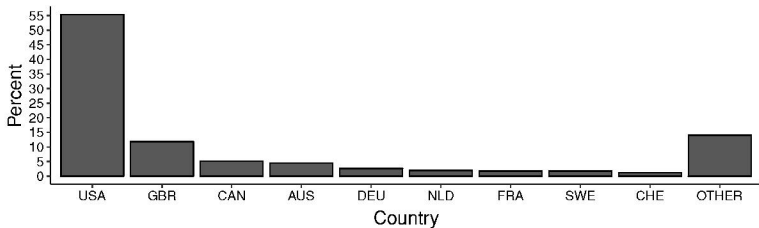

(B) Editors by Global Region

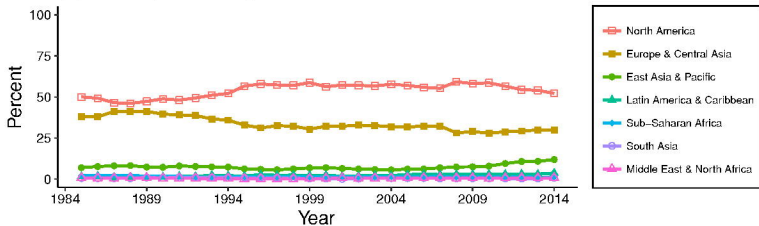

(C) Editors by Gross National Income Category

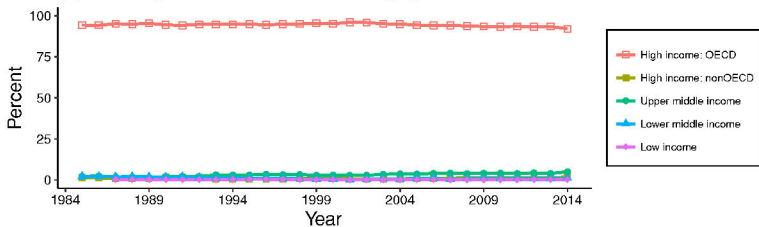

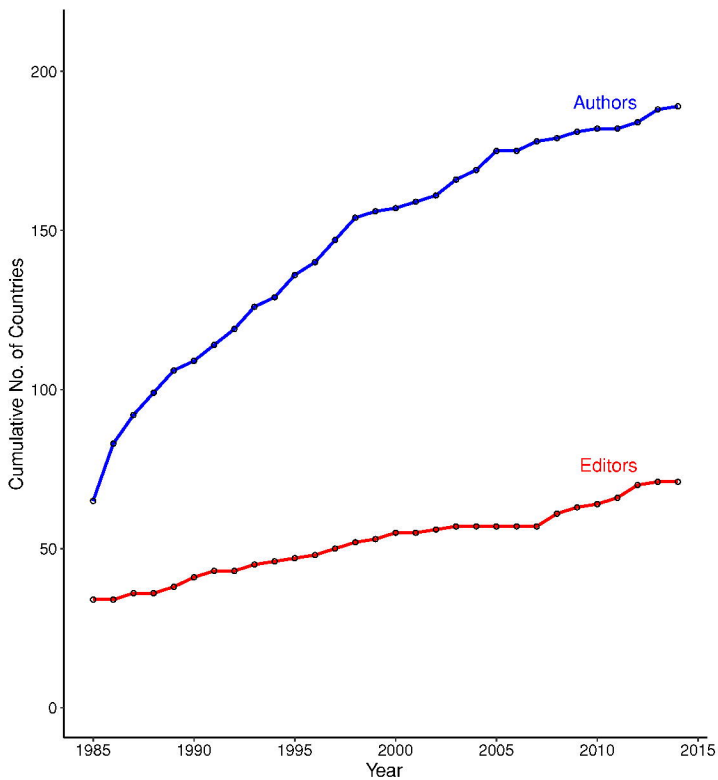

Source: http://www.biorxiv.org/content/10.1101/131292v2.full.pdf
